1 Full title

2 Investigating the barriers and enablers to outbreak reporting in the Asia-Pacific region: a  
3 mixed-methods study protocol

4 Short title

5 Barriers and enablers to outbreak reporting in the Asia-Pacific region

6

7 Authors

8 Amish Talwar<sup>1</sup>; Rebecca Katz<sup>2</sup>; Martyn D. Kirk<sup>1</sup>; Tambri Housen<sup>1,3</sup>

9

10 Affiliations

11 <sup>1</sup> National Centre for Epidemiology and Population Health, Australian National University,  
12 Canberra, Australian Capital Territory, Australia

13 <sup>2</sup> Center for Global Health Science and Security, Georgetown University, Washington, DC,  
14 United States

15 <sup>3</sup> School of Medicine and Public Health, University of Newcastle, Newcastle, New South  
16 Wales, Australia

17

18 Corresponding author

19 E-mail: [amish.talwar@anu.edu.au](mailto:amish.talwar@anu.edu.au) (AT)

## 20 **Abstract**

## 21 **Introduction**

22 The COVID-19 pandemic has raised concerns about the global capacity for timely outbreak  
23 reporting. However, gaps remain in our understanding of barriers and enablers to outbreak  
24 reporting, particularly at the local level. Field epidemiology training program (FETP) fellows  
25 often participate in the outbreak reporting process as part of both their training and the public  
26 health roles they assume after graduating; they therefore represent a potentially valuable  
27 source of information for better understanding these barriers and enablers. This study will  
28 investigate the barriers and enablers to outbreak reporting through a mixed methods approach  
29 that will encompass a review of the existing literature as well as surveying and interviewing  
30 FETP trainees and graduates from the Asia-Pacific region.

## 31 **Methods**

32 This study will begin with a scoping review of the literature to identify existing evidence of  
33 barriers and enablers to outbreak reporting. Based on our findings from the scoping review,  
34 we will administer a survey to FETP trainees and graduates from the World Health  
35 Organization Western Pacific and South-East Asian Regions and conduct interviews with a  
36 subset of survey respondents to investigate the survey findings in more detail. We will  
37 summarise and compare the survey results according to various country-level economic and  
38 political indicators, and we will employ thematic analysis to evaluate the interview responses.  
39 Based on the findings from the scoping review, survey, and interviews, we will construct a  
40 model to comprehensively describe the various barriers and enablers to outbreak reporting.

## 41 **Discussion**

42 This study will contribute to our understanding of the determinants of outbreak reporting  
43 across several geographic, political, and economic contexts by eliciting the viewpoints and  
44 experiences of persons involved with outbreak reporting, particularly at the local level. This  
45 information will help improve the outbreak reporting process, allowing for more timely  
46 reporting and helping prevent future outbreaks from becoming pandemics.

## 47 **Introduction**

48 The global reaction to the COVID-19 pandemic has raised concerns about the world's  
49 collective ability to detect, report, and respond to infectious disease outbreaks. Outbreak  
50 reporting is the process by which infectious disease outbreaks, once detected, are reported to  
51 public health officials; initial reporting to local public health officials is typically followed by  
52 escalation of the report to more senior public health authorities and, where necessary, to the  
53 international community to formulate an appropriate outbreak response. Timely outbreak  
54 reporting in turn can make the difference between containing an outbreak at its source and an  
55 outbreak growing into an epidemic or pandemic. The timeliness of outbreak reporting is  
56 contingent on a state's capacity to detect and report an outbreak up to the national level and  
57 its willingness to report it to the international community once aware of the outbreak within  
58 its borders. Thus, under the 2005 International Health Regulations (IHR), all IHR signatories  
59 have an obligation to develop and maintain the capacity to detect infectious disease outbreaks  
60 that can become international threats and to report these outbreaks to the international  
61 community through the World Health Organization (WHO) [1]. Under the IHR, most  
62 countries have agreed to report potential health events of international significance within 24  
63 hours of determining the existence of such an event [1].

64 However, delays in outbreak reporting at various levels of the reporting chain have persisted  
65 even after the revised IHR came into effect. This was the case for the Ebola outbreak in

66 Western Africa and most recently during COVID-19, where local delays in reporting the  
67 existence and extent of the COVID-19 outbreak at its initial stages delayed the global  
68 response to the outbreak by several weeks, allowing it to grow into a global pandemic [2-3].  
69 To prevent future pandemics, it is crucial to understand why nearly 20 years following the  
70 adoption of the most recent version of the IHR countries still experience failures reporting  
71 outbreaks in line with their international obligations.

72 Although there is a wide breadth of research on the various barriers and enablers across the  
73 outbreak reporting chain, comparatively little research has focused on the barriers and  
74 enablers at the local level, where outbreak reports originate. This is particularly true in the  
75 Asia-Pacific region, from where several pandemics have emerged in recent decades. Field  
76 epidemiology training programs (FETPs) produce skilled epidemiologists who learn to  
77 perform public health functions through experiential learning in field settings at the local and  
78 subnational level [4]. As part of their training, FETP trainees typically participate in  
79 surveillance and outbreak reporting activities [5]. Thus, FETP participants have unique  
80 insights into the various determinants of outbreak reporting, particularly at the local level.  
81 Therefore, this study seeks to leverage the knowledge of FETP-trained officials in the Asia-  
82 Pacific region to fill this knowledge gap by examining their observations and experiences  
83 regarding the factors that inhibit or enable outbreak reporting through a survey and key  
84 informant interviews.

## 85 **Evidence gap**

86 Previous studies that have examined the determinants of outbreak reporting have largely  
87 focused on countries' ability to detect and report outbreaks. While outbreak preparedness  
88 indices such as the Global Health Security Index (GHSI) mainly report on nation-level  
89 capacity for outbreak detection and reporting, other studies have focused on determinants

90 commonly found across different countries. In one such study, officials from Brazil, Ethiopia,  
91 Liberia, Nigeria, and Uganda identified a series of bottlenecks and enablers to outbreak  
92 detection and notification at all levels of their national public health systems [6-7]. These  
93 included the availability of core surveillance infrastructure (including laboratory  
94 infrastructure), physical infrastructure (including access to appropriate communications and  
95 transportation to facilitate outbreak detection and reporting), personnel resources and  
96 knowledge, community knowledge, and inter-agency cooperation and coordination [7].  
97 Having adequate and appropriately trained personnel to report remains a lynchpin for  
98 outbreak reporting. Therefore, additional research has examined the role of health care  
99 providers at the local level in reporting, who often are the first to detect potential outbreak  
100 cases and have the responsibility to report these cases to public health officials. These studies  
101 have identified various barriers to reporting among health care providers, including lack of  
102 reporting knowledge as well as lack of time and motivation to report [8-12].

103 Although capacity to report is a prerequisite for timely outbreak reporting, an environment  
104 conducive to reporting is also important for effecting an appropriate outbreak response,  
105 especially for outbreaks that threaten to grow rapidly and cross borders. A handful of studies  
106 have examined this additional condition for reporting among national governments. Two such  
107 studies involved surveys and interviews with officials affiliated with National Focal Points  
108 (NFPs), which are the country persons or offices responsible for collecting outbreak  
109 information and relaying information on potentially significant outbreaks to WHO for further  
110 dissemination to the international community to ensure an appropriate global response [13].  
111 While the respondents agreed that inadequate surveillance and reporting infrastructure was a  
112 major reporting barrier at all levels, they also indicated that fear of damage to tourism and  
113 trade as well as “political challenges” were important barriers to outbreak reporting at the  
114 national level [13-14]. These findings provided qualitative evidence supporting the results of

115 a previous study, which found that countries that are particularly vulnerable to trade or travel  
116 barriers after reporting an outbreak or in which higher domestic political opposition is present  
117 were more likely to demonstrate less timely reporting internationally, even after controlling  
118 for capacity to detect an outbreak [15].

119 Although these studies have helped define the determinants of outbreak reporting at various  
120 levels among a handful of countries, few studies have investigated the experiences of local  
121 and subnational public health officials within the Asia-Pacific region. This represents a  
122 significant gap given that this region contains over half the world's population, and four of  
123 the seven respiratory disease pandemics of the 20th and 21st centuries emerged from this  
124 region alone [3,16-20]. The handful of studies from the region that have investigated  
125 reporting barriers and enablers at the local and subnational levels have largely corroborated  
126 the above findings; however, they have focused on specific countries or disease contexts [21-  
127 23]. Furthermore, none of these studies have examined in-depth whether reporting officials,  
128 including both public health officials and health care providers, have experienced pressures to  
129 not report for either political, security, or economic reasons, despite such pressures likely  
130 having played a role during previous outbreaks, including SARS and COVID-19 [24-25].  
131 Lastly, these studies have failed to assess the relative importance of the various putative  
132 barriers and enablers to outbreak reporting. To address these gaps, this study will survey and  
133 interview FETP trainees and graduates across the Asia-Pacific region on their experiences  
134 and observations regarding putative barriers and enablers to outbreak reporting. Such a  
135 region-wide study can inform regionally relevant approaches to improve outbreak reporting  
136 and collaborative response.

## 137 **Study question and objective**

138 Our research question is the following:

- 139           • What are the barriers and enablers to outbreak reporting in the Asia-Pacific region  
140           at the local and subnational levels?

141 The objective of this study will be to elicit the views of FETP trainees and graduates from the  
142 Asia-Pacific region on the barriers and enablers to outbreak reporting based on their personal  
143 observations and experiences. This information will help identify potential interventions that  
144 can improve the outbreak reporting process and help prevent future outbreaks from becoming  
145 pandemics.

## 146 **Methods and Analysis**

### 147 **Study design**

148 This study will employ a mixed methods approach to assess these barriers and enablers by  
149 using both quantitative and qualitative methods for collecting data, which will then be  
150 integrated to derive findings and insights not possible with either approach alone [26].  
151 Specifically, this study will use an explanatory sequential design (Fig 1) in which a survey  
152 will first be administered to FETP trainees and graduates to explore their views on the  
153 importance of putative barriers and enablers to outbreak reporting [27]. The survey questions  
154 will be informed by a scoping review of the literature and consultations with subject matter  
155 experts affiliated with FETPs in the Asia-Pacific region and will be piloted with persons  
156 experienced with FETPs and outbreak reporting. Following survey administration, we will  
157 conduct semi-structured interviews with a subset of survey respondents to investigate the  
158 survey findings in more detail and to evaluate how they differ among varying geographic,  
159 political, and socioeconomic contexts [26,28]. Thus, the interviews will focus on both  
160 explaining and contextualizing the survey findings based on the unique perspectives and  
161 circumstances of these participants. Using data from the scoping review, survey, and  
162 interviews, we will construct a candidate conceptual model to describe the various barriers

163 and enablers to outbreak reporting from the local level to the national level and  
164 internationally. Participant recruitment began on 16 November 2023 and remains ongoing;  
165 we intend to end recruitment on 31 May 2024.

166 **Fig 1. Explanatory sequential study design.**

## 167 **Study population**

168 Our target population for the survey will be FETP trainees and graduates from FETPs located  
169 in the WHO Western Pacific Region (WPRO) and South-East Asian Region (SEARO) [29].

170 The nature and size of the population of persons with outbreak reporting responsibilities at  
171 the local and subnational levels in the WHO WPRO and SEARO regions are unclear.

172 Therefore, we will employ maximum variation sampling to capture a wide range of regional  
173 backgrounds and responses by approaching all FETPs from the two regions to administer the  
174 survey among current trainees and graduates [28]. In addition, we will disseminate the survey  
175 through the Training Programs in Epidemiology and Public Health Interventions Network  
176 (TEPHINET) global alumni listserv. TEPHINET helps develop and connect the various  
177 FETPs globally and can reach FETP alumni registered with TEPHINET [30].

178 For the interview phase, we will approach a subset of survey respondents who indicate  
179 willingness to be interviewed. We will again employ maximum variation sampling to select a  
180 diverse range of interviewees to reflect viewpoints and experiences across a variety of  
181 reporting settings among the regions surveyed. We will preferentially target survey  
182 respondents who provide detailed free text responses.

## 183 **Sampling**

### 184 **Survey**



185 As of 2023, there are 3,623 graduates from the 21 FETPs in the WPRO and SEARO regions  
186 listed with TEPHINET combined [31]. It is unclear how many FETP participants are  
187 currently in training; based on our experience with FETPs in these regions, we estimate that  
188 each of the 21 WPRO and SEARO FETPs listed with TEPHINET typically has two to five  
189 trainees at any one time, for a total of approximately 42-105 trainees from both regions [31].  
190 For this study, we will use the mean of this range (74 trainees) as our estimate for the total  
191 number of trainees. As part of field epidemiology training, all trainees are expected to be  
192 involved in surveillance and outbreak reporting. Although it is unclear how many FETP  
193 graduates from these regions continue to perform outbreak- and surveillance-related activities  
194 after graduating, a previous study found that 65.7% of graduates from the Eastern  
195 Mediterranean region investigate outbreaks, and 69.9%–71.7% work in public health  
196 surveillance [5]. Assuming that approximately 70% of graduates in the WPRO and SEARO  
197 regions also conduct surveillance and outbreak reporting activities, we anticipate a sample  
198 frame for this study of 2,610 persons. Based on a Cochran sample size calculation, we  
199 estimate our target sample size to be 335 persons at  $\alpha=0.05$  and  $p=0.5$  [32]. Previous studies  
200 have found the response rate for online surveys to be between 34% and 48% [33]. Because of  
201 the added challenges of responding to an online survey in a resource-limited setting and  
202 potential language barriers in completing a survey in the English language, we will assume a  
203 more conservative response rate of less than half this range, meaning that we assume a  
204 minimum 17% response rate; for our target sample size, this would require reaching out to  
205 1,971 persons. Thus, to meet our sample size goal, we will reach out to all 21 listed FETPs in  
206 the WPRO and SEARO regions to obtain permission to circulate the survey to trainees and  
207 graduates. We will also solicit participation from FETPs not listed with TEPHINET to  
208 maximize our sample. To determine a more exact target sample size for this population, we  
209 will ask each training program to provide information on the total number of trainees and  
210 graduates within their programs.

## 211 **Semi-structured interviews**

212 We will select respondents using a maximum variation sampling approach to reflect the  
213 geographical and economic diversity among the WPRO and SEARO countries and to identify  
214 shared patterns of experiences that cut across different national settings [28]. Interviews will  
215 continue until saturation has been reached (i.e., new data repeats what was expressed in  
216 previous data, and elicited themes begin to stabilise) or the list of candidate interviewees has  
217 been exhausted [34]. We will aim to interview at least 20 persons, with no more than three  
218 persons representing any individual country to ensure representation of varying reporting  
219 contexts [35].

## 220 **Data collection**

### 221 **Scoping review**

222 We will scope both the peer-reviewed and grey literature according to the PRISMA  
223 Extension for Scoping Review guidelines (PRISMA-ScR) to develop a more comprehensive  
224 understanding of the existing evidence of barriers and enablers to outbreak reporting among  
225 both primary data (e.g., data collected through interviews, focus groups, and surveys) and  
226 secondary data analysis (e.g., analysis of country-level data) [36]. We will identify relevant  
227 peer-reviewed literature (both quantitative and qualitative studies, including systematic and  
228 scoping reviews) and grey literature (non-peer reviewed reports and government documents)  
229 published from 15 January 2008 (six months after the 2005 IHR went into effect) to 31  
230 December 2023 among three online databases (PubMed, Scopus, and Web of Science) and  
231 Google Scholar. We will use search terms designed to elicit sources that address 1) outbreak  
232 reports and 2) barriers and enablers to outbreak reporting. In addition, we will search the  
233 reference lists of sources chosen for data abstraction for additional literature to review, and  
234 we will review country outbreak After Action Review reports provided by WHO [37].

## 235 Survey

236 The survey will collect demographic information as well as experiences with FETPs and  
237 outbreak reporting. Demographic information will include age, gender, level of education,  
238 country of work, public health role, type of FETP training, and country through which the  
239 FETP training was completed. The questions investigating knowledge and experiences with  
240 putative barriers and enablers to reporting will be generated based on previous research,  
241 including the scoping review. These questions will focus on barriers and enablers related to  
242 capacity, coordination, and communication; training and socialization around reporting;  
243 motivation and incentives to report; and authority to report. In addition, the survey will  
244 investigate whether reporting officials have felt pressure to not report or feared economic  
245 consequences from reporting to evaluate the impact of organizational, political, and economic  
246 factors on reporting. The relative importance of these barriers and enablers to outbreak  
247 reporting will be assessed using a Likert scale of 1 to 3, where 1 equals “No impact”, 2 equals  
248 “Some impact”, and 3 equals “High impact”. Free text prompts will allow respondents to  
249 further contextualize their responses. We will refine the survey based on input provided by  
250 subject matter experts affiliated with FETPs in the Asia-Pacific region. We will then pilot the  
251 survey with persons experienced with FETPs and outbreak reporting, including FETP trainers  
252 and graduates. The survey will be administered through Qualtrics [38].

253 We will analyse the survey findings in the context of various empirical economic and  
254 political indicators by which the respondents’ country of work can be classified. Although a  
255 previous study did not find a correlation between regime type and outbreak reporting time, a  
256 later study did find that domestic commitment to rule of law was significantly associated with  
257 outbreak reporting time [15,39]. This latter study also found that development level (i.e.,  
258 gross domestic product [GDP] per capita), exports and imports as a share of GDP, and  
259 contribution of travel and tourism to GDP were significantly associated with outbreak

260 reporting time [15]. Another study found that increased internet usage and freedom of the  
261 press were associated with timelier outbreak reporting, which might reflect the availability of  
262 unofficial channels for outbreak reporting, including rumours and media reports [40]. To  
263 account for the impacts of these factors on outbreak reporting, we will stratify the  
264 respondents' country of work according to the following covariates and compare the survey  
265 results across these strata: income level, trade exposure according to GDP, contribution of  
266 travel and tourism to GDP, rule of law based on the Worldwide Governance Indicators,  
267 number of internet users, and freedom of the press [41-45].

## 268 **Semi-structured interviews**

269 Interviews will be either held in-person or online on Zoom between the first author and each  
270 participant individually. The interviews are anticipated to last for 45 to 60 minutes. The  
271 results of the scoping review and survey will inform the creation of semi-structured interview  
272 questions for the interviews. These questions will elicit further contextual information and  
273 perspectives regarding commonly identified barriers and enablers as well as details about  
274 unique barriers and enablers that are outliers with respect to these findings. We will  
275 transcribe the interviews verbatim to facilitate data analysis.

## 276 **Reflexivity**

277 The primary researcher's background as a physician and public health specialist with field  
278 epidemiology training and outbreak response experience informed his interest in the research  
279 question based on his experience that timely outbreak detection and reporting are crucial to  
280 effective outbreak containment. This background also helped the primary researcher identify  
281 FETP trainees and graduates as a likely valuable source of information on the outbreak  
282 reporting process. However, the primary researcher's training and experience can also affect  
283 the interview questions asked, interpretations made, and the researcher-interviewee dynamic

284 itself by providing a pre-defined understanding of outbreak reporting for the researcher and  
285 how it can be ideally realised, which might differ from the experiences and understandings of  
286 the interviewees. To facilitate reflexivity, the primary researcher will keep a research journal  
287 to record post-interview reflections to engage their evolving perception of the data with  
288 respect to their own experiences, shape understanding of the researcher-interviewee dynamic,  
289 inform future interviews, and refine candidate interview themes [46].

## 290 **Data analysis**

### 291 **Scoping review**

292 Data extraction and analysis will proceed per established guidelines for scoping reviews [47].  
293 We will extract the following data from the selected literature into a Microsoft Excel  
294 spreadsheet: study author, title, journal name, year of publication, and study type; study  
295 purpose, methodology, target population, location, and start/end date; and evidence for  
296 barriers and enablers to outbreak reporting. Based on the extracted data, we will summarize  
297 the reviewed literature based on numbers of sources per country, target population, study  
298 type, and methodology; we will present these data in a table along with a descriptive  
299 summary. We will also identify common findings across the various literature reviewed and  
300 will synthesize these thematically into a coherent narrative description, which will be  
301 summarized in a table or flowchart. The results of this review will inform the construction of  
302 survey questions about respondents' experiences with barriers and enablers to outbreak  
303 reporting.

### 304 **Survey**

305 We will report counts and percentages for all variables. For Likert variables, we will report  
306 median and interquartile range. We will analyse differences in weighted median ordinal  
307 responses and GHSI scores for detecting public health events according to the covariates

308 described above (rule of law, trade exposure, contribution of travel and tourism to GDP,  
309 country income level, number of internet users, and freedom of press), where weighted  
310 medians will be calculated for each stratum [48]. We will compare weighted median ordinal  
311 responses and GHSI scores between different income groups using the Kruskal-Wallis test,  
312 and we will employ the pair-wise Wilcoxon rank sum test for post-hoc analysis to determine  
313 which groups significantly differ ( $\alpha=0.05$ ). For rule of law, trade exposure, travel and  
314 tourism, internet use, and freedom of press indicators, we will assess for association with  
315 weighted median ordinal responses and GHSI scores using Spearman's rank correlation  
316 ( $\alpha=0.05$ ). We will perform all quantitative survey analyses in R [49].

317 We will thematically summarize the findings from the free text box responses using content  
318 analysis, where we will inductively code the text into thematic categories and triangulate  
319 these findings with the scaled responses [27,50]. We will then use the triangulated findings to  
320 inform the interview questions, thereby integrating the study designs [50,51]. Where example  
321 quotes are provided verbatim, the quotes will not be attributable by country to protect  
322 respondents from unintentional identification.

### 323 **Semi-structured interviews**

324 We will use thematic analysis incorporating the Framework Method to analyse the interview  
325 data [52-53]. First, we will deductively code themes elicited from the findings from the  
326 scoping review and survey and group the codes within a working analytical framework [53].  
327 Using these codes, two researchers will then conduct a thematic analysis employing a  
328 "coding reliability" approach where they will label themes identified in the interviews with  
329 these predetermined codes; while one of the coders will be an existing researcher on our  
330 team, the other coder will be an outside researcher unaffiliated with the study [52-53]. To  
331 begin, the coders will review the interview transcripts and corresponding audio to familiarise  
332 themselves with the data. Next, the two coders will code the interview data into a framework

333 matrix [53]. After coding at least the first three transcripts, the two researchers will meet to  
334 compare their coded transcripts and to adjust the analytical framework where necessary given  
335 the transcript data, including adding new codes or modifying/deleting existing codes [53].  
336 The coders will continue to adjust the analytic framework as needed until the final transcript  
337 has been coded [53]. On completion of coding, the coders will interpret the matrix data to  
338 identify overarching themes, including themes consistent with the previous scoping review  
339 and interview data as well as novel ones [53]. In addition, we will calculate the level of  
340 agreement between the two coders using Cohen's kappa and recode as necessary if  
341 significant differences emerge [52]. Where necessary to discuss participant work location, we  
342 will report WHO region and country income level stratum instead of country name to protect  
343 interviewee privacy given that both interview findings and country name data might together  
344 facilitate interviewee identification. We will code the interview data using NVivo 12 and  
345 generate the analytical framework within a Microsoft Excel spreadsheet [54].

## 346 **Data interpretation**

347 We will depict the integrated findings from the scoping review, survey responses, and  
348 interviews using joint displays to visually draw out unique insights that are only accessible  
349 through joint interpretation of the quantitative and qualitative data [51,55]. Based on these  
350 findings, we will develop a conceptual model incorporating all the known factors that impact  
351 outbreak reporting at the local, subnational, and national levels and their interactions across  
352 all levels. We will share preliminary interview findings with interviewees to obtain feedback  
353 on our results and interpretation.

## 354 **Patient and public involvement**

355 As stated above, we will consult with subject matter experts to develop the survey instrument  
356 and will reach out to TEPHINET and FETPs to disseminate the survey among FETP trainees

357 and graduates. We will directly recruit interviewees among survey respondents who volunteer  
358 to be interviewed.

## 359 **Ethics and Dissemination**

### 360 **Ethics**

361 The proposed research activities have been approved by the Human Ethics Office at the  
362 Australian National University (protocol number 2023-196). We will apply for any protocol  
363 amendments with this office.

### 364 **Consent**

365 Before beginning the survey or interview, participants must read a “Participant Information  
366 Sheet” that outlines the study; they must then click “Yes” to the survey question asking for  
367 consent to participate in the survey or sign and submit by email or post a written consent  
368 form to be interviewed. Participation in the survey and interviews will be voluntary, and  
369 participants are free to withdraw from participation at any point while taking the survey or  
370 being interviewed.

### 371 **Confidentiality**

372 We will keep participant identities confidential as far as allowed by law. For the survey we  
373 will not require name or contact information unless the respondent would like to be contacted  
374 to participate in an interview. We will use this information to create a candidate interviewee  
375 list; after abstracting this contact information into this list, we will delete this information  
376 from the survey platform. The data interviewees provide will be de-identified, including  
377 name as well as any incidentally identifying information provided during the interview.  
378 Identifying details (i.e., name and email address) will be stored separately from the rest of the



379 research data in the candidate interviewee list, which will be linked back to each interview  
380 within this document. Access to the data will be restricted to the research team. Published  
381 results will only be reported in aggregate (except for de-identified quotations where  
382 appropriate), and participants will not be identifiable within published outputs. Furthermore,  
383 as interview participants could potentially be identified from a publication based on being  
384 associated with their country affiliation, these country affiliations will not be referred to in  
385 any publication.

## 386 **Expected output**

387 We will use previous research and results from this study to develop a conceptual model  
388 incorporating all the known factors that impact outbreak reporting at the local, subnational,  
389 and national levels. This will allow for the coordinated development of key interventions  
390 appropriate for each reporting level to improve the outbreak reporting process. More  
391 generally, this study will highlight the need to account for the many different determinants of  
392 outbreak reporting, including capacity to detect and report outbreaks and political or  
393 economic barriers to reporting.

## 394 **Dissemination**

395 We will share the results of this study at academic conferences and through peer-reviewed  
396 reports published in relevant research journals. All survey and interview participants will be  
397 provided a URL link to review study outputs. All study data will be retained and securely  
398 stored for at least five years following publications arising from this research. After the  
399 storage period, de-identified study data will be archived at the Australian Data Archive for  
400 use in later research, including potentially by other researchers [56].

## 401 **Discussion**

402 In the wake of the COVID-19 pandemic, the world has begun the process of reforming the  
403 body of global health law that informs pandemic preparedness and response, including  
404 amending the 2005 IHR and adopting a new pandemic treaty [57-58]. The proposed reforms  
405 mainly target country-level barriers to outbreak reporting, particularly the capacity to detect  
406 and report outbreaks. However, all outbreak reports start at the local level before moving up  
407 through various layers of a country's public health system. As such, it will be crucial to  
408 evaluate and address the barriers at all levels of the outbreak reporting system to effect  
409 successful reforms to prepare for future outbreaks.

410 With outbreak reporting responsibilities at various levels of the public health system, FETP-  
411 trained officials represent a potentially invaluable source of information on the various  
412 barriers and enablers to outbreak reporting at all levels of a public health system. By  
413 evaluating the experiences of FETP trainees and graduates in the Asia-Pacific region, this  
414 study will build on previous studies that have evaluated outbreak reporting within specific  
415 country settings or among specific reporting groups to develop a more comprehensive  
416 overview of the various outbreak reporting barriers and enablers and to inform relevant  
417 approaches to improve reporting and collaborative response.

418 This study is subject to several limitations. Selection bias might affect the survey results,  
419 where persons with reliable internet access and fluency in the survey language will be more  
420 likely to complete the survey. In addition, this study will elicit the views and experiences of a  
421 select population of public health officials, which might constrain the applicability of the  
422 study findings beyond settings encountered by FETP-trained officials. This study mitigates  
423 these concerns by distributing the survey in a platform that is readily accessible among  
424 various mobile phone and computer devices and by recruiting persons with FETP experiences  
425 at different levels of government across various countries. Furthermore, potential respondents  
426 might choose not to participate in the survey or interviews for fear of being identified and

427 associated with their responses, leading to harmful professional, economic, or legal impacts.  
428 To mitigate privacy concerns, the survey and interviews will be fully anonymous, unless a  
429 participant asks to be identified.

430 This study is also limited by the study investigators' particular knowledge and experience. As  
431 such, the questions to be asked in the survey and interviews might not adequately account for  
432 the variety of challenges faced by FETP officials from a variety of different settings. To help  
433 address this bias, we will review and pilot this survey with persons who have experience with  
434 outbreak reporting in various countries in the Asia-Pacific region. In addition, the interview  
435 research journal will help to illuminate any biases with respect to the interviewer's  
436 questioning.

437 Despite these limitations, this study will fill a major gap in our understanding of the  
438 determinants of outbreak reporting across several geographic, political, and economic  
439 contexts by eliciting the viewpoints and experiences of persons with exposure to outbreak  
440 reporting across various settings. This information will help improve the outbreak reporting  
441 process, allowing for more timely reporting and helping prevent outbreaks from growing into  
442 devastating epidemics or pandemics.

## 443 **Author contributions**

444 AT: conceptualization, methodology, writing – original draft preparation

445 RK, MDK, TH: methodology, supervision, writing – review and editing

## 446 **Acknowledgments**

447 We thank Amy E. Parry for her invaluable recommendations while developing this project.

## 448 **References**

- 449 1. World Health Organization. International Health Regulations (2005). 3rd ed. Geneva:  
450 World Health Organization; 2016.
- 451 2. Kickbusch I, Liu A. Global health diplomacy-reconstructing power and governance.  
452 Lancet. 2022 Jun 4;399(10341):2156-2166. doi: 10.1016/S0140-6736(22)00583-9.
- 453 3. Singh S, McNab C, Olson RM, Bristol N, Nolan C, Bergström E, et al. How an outbreak  
454 became a pandemic: a chronological analysis of crucial junctures and international  
455 obligations in the early months of the COVID-19 pandemic. Lancet. 2021 Dec  
456 4;398(10316):2109-2124. doi: 10.1016/S0140-6736(21)01897-3.
- 457 4. André AM, Lopez A, Perkins S, Lambert S, Chace L, Noudeke N, et al. Frontline Field  
458 Epidemiology Training Programs as a Strategy to Improve Disease Surveillance and  
459 Response. Emerg Infect Dis. 2017 Dec;23(13):S166–73. doi: 10.3201/eid2313.170803.
- 460 5. Al Nsour M, Khader Y, Bashier H, Alsoukhni M. Evaluation of Advanced Field  
461 Epidemiology Training Programs in the Eastern Mediterranean Region: A Multi-Country  
462 Study. Front Public Health. 2021 Jul 22;9:684174. doi: 10.3389/fpubh.2021.684174.
- 463 6. Nuclear Threat Initiative. Global Health Security Index: GHS Index Methodology  
464 [Internet]. Washington (DC): Nuclear Threat Initiative; 2021 November [cited 2023  
465 April 11]. Available from: [https://www.ghsindex.org/wp-](https://www.ghsindex.org/wp-content/uploads/2021/11/2021_GHSIndex_Methodology_FINAL.pdf)  
466 [content/uploads/2021/11/2021\\_GHSIndex\\_Methodology\\_FINAL.pdf](https://www.ghsindex.org/wp-content/uploads/2021/11/2021_GHSIndex_Methodology_FINAL.pdf)
- 467 7. Bochner AF, Makumbi I, Aderinola O, Abayneh A, Jetoh R, Yemanaberhan RL, et al.  
468 Implementation of the 7-1-7 target for detection, notification, and response to public  
469 health threats in five countries: a retrospective, observational study. Lancet Glob Health.  
470 2023 Jun;11(6):e871-e879. doi: 10.1016/S2214-109X(23)00133-X.
- 471 8. Do H, Ho HT, Tran PD, Nguyen DB, Otsu S, de Vázquez CC, et al. Building the hospital  
472 event-based surveillance system in Viet Nam: a qualitative study to identify potential

- 473 facilitators and barriers for event reporting. *Western Pac Surveill Response J.* 2020 Sep  
474 30;11(3):10-20. doi: 10.5365/wpsar.2019.10.1.009.
- 475 9. Fill MA, Murphree R, Pettit AC. Health Care Provider Knowledge and Attitudes  
476 Regarding Reporting Diseases and Events to Public Health Authorities in Tennessee. *J*  
477 *Public Health Manag Pract.* 2017 Nov/Dec;23(6):581-588. doi:  
478 10.1097/PHH.0000000000000492.
- 479 10. Lafond KE, Dalhatu I, Shinde V, Ekanem EE, Ahmed S, Peebles P, et al. Notifiable  
480 disease reporting among public sector physicians in Nigeria: a cross-sectional survey to  
481 evaluate possible barriers and identify best sources of information. *BMC Health Serv*  
482 *Res.* 2014 Nov 13;14:568. doi: 10.1186/s12913-014-0568-3.
- 483 11. Steele L, Orefuwa E, Dickmann P. Drivers of earlier infectious disease outbreak  
484 detection: a systematic literature review. *Int J Infect Dis.* 2016 Dec;53:15-20. doi:  
485 10.1016/j.ijid.2016.10.005.
- 486 12. Tan HF, Yeh CY, Chang HW, Chang CK, Tseng HF. Private doctors' practices,  
487 knowledge, and attitude to reporting of communicable diseases: a national survey in  
488 Taiwan. *BMC Infect Dis.* 2009 Jan 29;9:11. doi: 10.1186/1471-2334-9-11.
- 489 13. Packer C, Halabi SF, Hollmeyer H, Mithani SS, Wilson L, Ruckert A, et al. A survey of  
490 International Health Regulations National Focal Points experiences in carrying out their  
491 functions. *Global Health.* 2021 Mar 6;17(1):25. doi: 10.1186/s12992-021-00675-7.
- 492 14. Halabi S, Wilson K. The Independence of National Focal Points Under the International  
493 Health Regulations (2005). *Harvard Int Law J.* 2022;63(1):135-179.
- 494 15. Worsnop CZ. Concealing Disease: Trade and Travel Barriers and the Timeliness of  
495 Outbreak Reporting. *Int Stud Perspect.* 2019;20:344-372. doi: 10.1093/isp/ekz005.

- 496 16. de Groot RJ, Baker SC, Baric RS, Brown CS, Drosten C, Enjuanes L, et al. Middle East  
497 respiratory syndrome coronavirus (MERS-CoV): announcement of the Coronavirus  
498 Study Group. *J Virol*. 2013 Jul;87(14):7790-2. doi: 10.1128/JVI.01244-13.
- 499 17. Institute of Medicine (US) Forum on Microbial Threats. Learning from SARS: Preparing  
500 for the Next Disease Outbreak: Workshop Summary. Knobler S, Mahmoud A, Lemon S,  
501 Mack A, Sivitz L, Oberholtzer K, editors. Washington (DC): National Academies Press  
502 (US); 2004.
- 503 18. Piret J, Boivin G. Pandemics Throughout History. *Front Microbiol*. 2021 Jan  
504 15;11:631736. doi: 10.3389/fmicb.2020.631736. Erratum in: *Front Microbiol*. 2022 Sep  
505 27;13:988058.
- 506 19. World Bank Group. Population, total [Internet]. Washington (DC): World Bank Group;  
507 2023 [cited 2023 May 29]. Available from:  
508 <https://data.worldbank.org/indicator/SP.POP.TOTL>
- 509 20. World Health Assembly, 64. Implementation of the International Health Regulations  
510 (2005): Report of the Review Committee on the Functioning of the International Health  
511 Regulations (2005) in relation to Pandemic (H1N1) 2009: report by the Director-General  
512 (A64/10) [Internet]. Geneva: World Health Organization; 2011 [cited 2023 May 4].  
513 Available from: [https://apps.who.int/iris/bitstream/handle/10665/3350/A64\\_10-en.pdf](https://apps.who.int/iris/bitstream/handle/10665/3350/A64_10-en.pdf)
- 514 21. Bashir K, Wani KA, Qurieshi MA, Khan SMS, Haq I. Measles surveillance in Kashmir:  
515 A mixed methods study. *Indian J Public Health*. 2022 Jul-Sep;66(3):251-256. doi:  
516 10.4103/ijph.ijph\_1482\_21.
- 517 22. Craig AT, Kaldor J, Schierhout G, Rosewell AE. Surveillance strategies for the detection  
518 of disease outbreaks in the Pacific islands: meta-analysis of published literature, 2010-  
519 2019. *Trop Med Int Health*. 2020 Aug;25(8):906-918. doi: 10.1111/tmi.13448.

- 520 23. Manurung MK, Reo SE, Pardosi JF, Muscatello DJ. Evaluation of the Indonesian Early  
521 Warning Alert and Response System (EWARS) in West Papua, Indonesia. *WHO South*  
522 *East Asia J Public Health*. 2020 Sep;9(2):111-117. doi: 10.4103/2224-3151.294304.
- 523 24. Li M. Public Health Crises In Comparison: China's Epidemic Response Policies From  
524 SARS To COVID-19. *Glob Public Health*. 2021 Aug-Sep;16(8-9):1223-1236. doi:  
525 10.1080/17441692.2021.1919735.
- 526 25. Maciel AL, de Carvalho BA, Timmons S, Padoveze MC. Barriers to investigating and  
527 reporting nosocomial outbreaks to health authorities in São Paulo, Brazil: a mixed  
528 methods approach. *J Hosp Infect*. 2016 Dec;94(4):330-337. doi:  
529 10.1016/j.jhin.2016.06.022.
- 530 26. Doyle L, Brady AM, Byrne G. An overview of mixed methods research. *J Res Nurs*.  
531 2009;14(2):175-185. doi: 10.1177/1744987108093962.
- 532 27. Creswell JW, Plano Clark VL. *Designing and conducting mixed methods research*.  
533 London: SAGE Publications Ltd; 2007.
- 534 28. Palinkas LA, Horwitz SM, Green CA, Wisdom JP, Duan N, Hoagwood K. Purposeful  
535 Sampling for Qualitative Data Collection and Analysis in Mixed Method Implementation  
536 Research. *Adm Policy Ment Health*. 2015 Sep;42(5):533-44. doi: 10.1007/s10488-013-  
537 0528-y.
- 538 29. World Health Organization. WHO regional offices [Internet]. Geneva: World Health  
539 Organization; 2023 [cited 2023 May 29]. Available from:  
540 <https://www.who.int/about/who-we-are/regional-offices>
- 541 30. Training Programs in Epidemiology and Public Health Interventions Network. Vision,  
542 Mission and History [Internet]. Atlanta, GA: Training Programs in Epidemiology and

- 543 Public Health Interventions Network; 2023 [cited 2023 September 25]. Available from:  
544 <https://www.tephinet.org/who-we-are/vision-mission-and-history>
- 545 31. Training Programs in Epidemiology and Public Health Interventions Network. Training  
546 programs [Internet]. Atlanta, GA: Training Programs in Epidemiology and Public Health  
547 Interventions Network; 2023 [cited 2023 May 29]. Available from:  
548 <https://www.tephinet.org/training-programs>
- 549 32. Bartlett JE, Kotrlik JW, Higgins CC. Organizational research: Determining appropriate  
550 sample size in survey research. *Information Technology, Learning, and Performance*  
551 *Journal*. 2001;19(1):43-50.
- 552 33. Wu M-J, Zhao K, Fils-Aime F. Response rates of online surveys in published research: A  
553 meta-analysis. *Computers in Human Behavior Reports*. 2022;7:100206. doi:  
554 10.1016/j.chbr.2022.100206.
- 555 34. Saunders B, Sim J, Kingstone T, Baker S, Waterfield J, Bartlam B, et al. Saturation in  
556 qualitative research: exploring its conceptualization and operationalization. *Qual Quant*.  
557 2018;52(4):1893-1907. doi: 10.1007/s11135-017-0574-8.
- 558 35. Braun V. *Successful qualitative research: A practical guide for beginners*. London:  
559 SAGE Publications Ltd; 2013.
- 560 36. Tricco AC, Lillie E, Zarin W, O'Brien KK, Colquhoun H, Levac D, et al. PRISMA  
561 Extension for Scoping Reviews (PRISMA-ScR): Checklist and Explanation. *Ann Intern*  
562 *Med*. 2018 Oct 2;169(7):467-473. doi: 10.7326/M18-0850.
- 563 37. World Health Organization. *After Action Review (AAR)* [Internet]. Geneva: World  
564 Health Organization; 2024 [cited 2024 January 24]. Available from:  
565 <https://extranet.who.int/sph/after-action-review>



- 566 38. Qualtrics. Qualtrics [Computer software]. Provo, UT: Qualtrics; 2020. Available from:  
567 <https://www.qualtrics.com>
- 568 39. Kluberg SA, Mekaru SR, McIver DJ, Madoff LC, Crawley AW, Smolinski MS, et al.  
569 Global Capacity for Emerging Infectious Disease Detection, 1996-2014. *Emerg Infect*  
570 *Dis.* 2016 Oct;22(10):E1-6. doi: 10.3201/eid2210.151956.
- 571 40. McAlarnen L, Smith K, Brownstein JS, Jerde C. Internet and free press are associated  
572 with reduced lags in global outbreak reporting. *PLoS Curr.* 2014 Oct  
573 30;6:ecurrents.outbreaks.cccdec16fa17091eea4c4a725dba9e16. doi:  
574 10.1371/currents.outbreaks.cccdec16fa17091eea4c4a725dba9e16.
- 575 41. Reporters Without Borders. World Press Freedom Index [Internet]. Paris: Reporters  
576 Without Borders; 2023 [cited 2023 September 25]. Available from:  
577 <https://rsf.org/en/index>
- 578 42. World Bank Group. World Bank Country and Lending Groups [Internet]. Washington  
579 (DC): World Bank Group; 2023 [cited 2023 September 25]. Available from:  
580 [https://datahelpdesk.worldbank.org/knowledgebase/articles/906519-world-bank-country-](https://datahelpdesk.worldbank.org/knowledgebase/articles/906519-world-bank-country-and-lending-groups)  
581 [and-lending-groups](https://datahelpdesk.worldbank.org/knowledgebase/articles/906519-world-bank-country-and-lending-groups)
- 582 43. World Bank Group. TCdata360 [Internet]. Washington (DC): World Bank Group; 2023  
583 [cited 2023 May 31]. Available from: <https://tcdata360.worldbank.org>
- 584 44. World Bank Group. Worldwide Governance Indicators [Internet]. Washington (DC):  
585 World Bank Group; 2023 [cited 2023 September 25]. Available from:  
586 <https://info.worldbank.org/governance/wgi/#home>
- 587 45. World Bank Group. States and Markets [Internet]. Washington (DC): World Bank  
588 Group; 2023 [cited 2023 September 25]. Available from:

- 589 <https://datatopics.worldbank.org/world-development-indicators/themes/states-and->  
590 [markets.html](https://datatopics.worldbank.org/world-development-indicators/themes/states-and-markets.html)
- 591 46. Olmos-Vega FM, Stalmeijer RE, Varpio L, Kahlke R. A practical guide to reflexivity in  
592 qualitative research: AMEE Guide No. 149. *Med Teach*. 2022 Apr 7;1-11. doi:  
593 10.1080/0142159X.2022.2057287.
- 594 47. Peters MD, Godfrey CM, Khalil H, McInerney P, Parker D, Soares CB. Guidance for  
595 conducting systematic scoping reviews. *Int J Evid Based Healthc*. 2015 Sep;13(3):141-6.  
596 doi: 10.1097/XEB.0000000000000050.
- 597 48. Bell JA, Nuzzo JB. Global Health Security Index: Advancing Collective Action and  
598 Accountability Amid Global Crisis [Internet]. Washington (DC): Nuclear Threat  
599 Initiative; 2021 [cited 2023 May 5]. Available from: [https://www.ghsindex.org/wp-](https://www.ghsindex.org/wp-content/uploads/2021/12/2021_GHSindexFullReport_Final.pdf)  
600 [content/uploads/2021/12/2021\\_GHSindexFullReport\\_Final.pdf](https://www.ghsindex.org/wp-content/uploads/2021/12/2021_GHSindexFullReport_Final.pdf)
- 601 49. R Core Team. R: A language and environment for statistical computing [Computer  
602 software]. Vienna, Austria: R Foundation for Statistical Computing; 2022. Available  
603 from: <https://www.R-project.org/>
- 604 50. Ayton D, Tsingos T, Berkovic D. Qualitative Research – a practical guide for health and  
605 social care researchers and practitioners. Melbourne, Australia: Monash University;  
606 2023.
- 607 51. Fetters MD, Curry LA, Creswell JW. Achieving integration in mixed methods designs-  
608 principles and practices. *Health Serv Res*. 2013 Dec;48(6 Pt 2):2134-56. doi:  
609 10.1111/1475-6773.12117.
- 610 52. Gale NK, Heath G, Cameron E, Rashid S, Redwood S. Using the framework method for  
611 the analysis of qualitative data in multi-disciplinary health research. *BMC Med Res*  
612 *Methodol*. 2013 Sep 18;13:117. doi: 10.1186/1471-2288-13-117.

- 613 53. Braun V, Clarke V, Hayfield N, Terry G. Thematic Analysis. In Liamputtong P, editor.  
614 Handbook of Research Methods in Health Social Sciences. Singapore: Springer Nature  
615 Singapore Pte Ltd; 2019. p. 843-860.
- 616 54. Lumivero. NVivo (Version 12) [Computer software]. Denver, CO: Lumivero; 2018.  
617 Available from: <https://www.lumivero.com>
- 618 55. Guetterman TC, Fetters MD, Creswell JW. Integrating Quantitative and Qualitative  
619 Results in Health Science Mixed Methods Research Through Joint Displays. *Ann Fam*  
620 *Med*. 2015 Nov;13(6):554-61. doi: 10.1370/afm.1865.
- 621 56. Australian Data Archive. The Australian Data Archive [Internet]. Canberra, Australia:  
622 Australian Data Archive; 2024 [cited 2024 January 24]. Available from:  
623 <https://ada.edu.au/>
- 624 57. Intergovernmental Negotiating Body to Draft and Negotiate a WHO Convention,  
625 Agreement or Other International Instrument on Pandemic Prevention, Preparedness and  
626 Response. Zero draft of the WHO CA+ for the consideration of the Intergovernmental  
627 Negotiating Body at its fourth meeting [Internet]. Geneva: World Health Organization;  
628 2023 Feb 1 [cited 2023 Feb 17]. Available from:  
629 [https://apps.who.int/gb/inb/pdf\\_files/inb4/A\\_INB4\\_3-en.pdf](https://apps.who.int/gb/inb/pdf_files/inb4/A_INB4_3-en.pdf)
- 630 58. Working Group on Amendments to the International Health Regulations (2005). Article-  
631 by-Article Compilation of Proposed Amendments to the International Health Regulations  
632 (2005) submitted in accordance with decision WHA75(9) (2022) [Internet]. Geneva:  
633 World Health Organization [cited 2023 Jun 11]. Available from:  
634 [https://apps.who.int/gb/wgihr/pdf\\_files/wgihr1/WGIHR\\_Compilation-en.pdf](https://apps.who.int/gb/wgihr/pdf_files/wgihr1/WGIHR_Compilation-en.pdf)

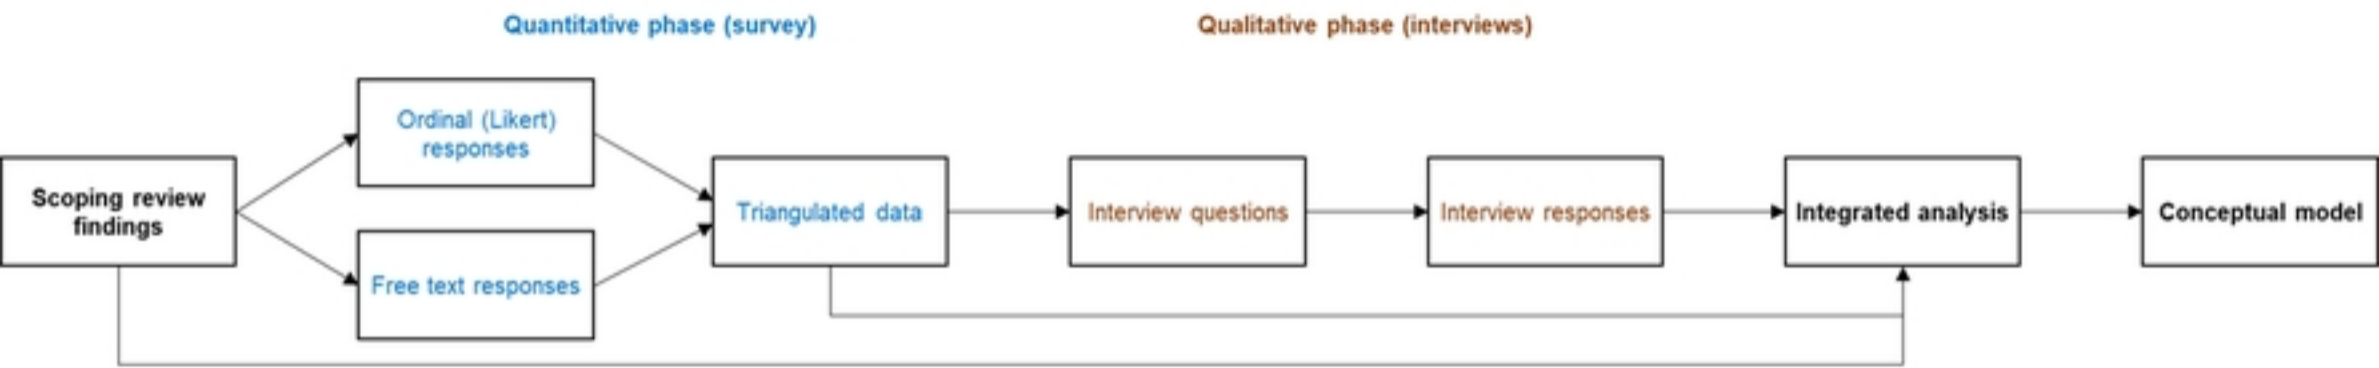

Figure
